# Supplementary material for: Branching morphogenesis in the developing kidney is not impacted by nephron formation or integration
Source: eLife. 2018 Jul 31;7:e38992. doi: 10.7554/eLife.38992 (PMC6115188; doi:10.7554/eLife.38992)
Supplement: Figure 1—source data 1. — Confocal microscopy and Imaris software were used to view kidneys stained with anti-cytokeratin antibodies and count the number of nephron connections for multiple tips from multiple kidneys. The counts were binned into two groups; a single connection and more than one connection (the first column, nephron.connections). The proportion of tips counted with the number of nephron connections listed is in the third column. [file elife-38992-fig1-data1.xlsx]

## Sheet: Sheet1
nephron.connections	Embryonic Day	proportion of tip with A1 nephron connections
1	12.5	0.3
1	13.5	0.375
1	14.5	0.869565
1	15.5	0.935484
1	17.5	0.971429
1	19.5	1
1	21.5	1
1	22.5	1
>1	12.5	0
>1	13.5	0
>1	14.5	0.0434783
>1	15.5	0.129032
>1	17.5	0.228571
>1	19.5	0.446429
>1	21.5	0.634146
>1	22.5	0.666667
