# Supplementary material for: Branching morphogenesis in the developing kidney is not impacted by nephron formation or integration
Source: eLife. 2018 Jul 31;7:e38992. doi: 10.7554/eLife.38992 (PMC6115188; doi:10.7554/eLife.38992)
Supplement: Figure 1—source data 2. — Each row represents an analysis of a single kidney from an individual embryo. The kidneys were whole mount stained and analysed using Optical Projection Tomography and Tree Surveyor software, or confocal microscopy and Imaris software, as described in the methods. For stages 7 to 13, Tree Surveyor was used to reconstruct the ureteric trees, and provide a count of the tip number for each ureteric tree analysed. For stages 12 to 15, confocal microscopy was paired with Imaris analysis. Tips were identified using the property that a single cluster of cap mesenchyme cells associates with a single ureteric tree tip. In this counting method, clusters of cap mesenchyme were manually counted in Imaris to provide an estimate of tip number. [file elife-38992-fig1-data2.xlsx]

## Sheet: Sheet1
Stage	Embryonic Day €	Tip.Number
7	11.5	6
7	11.5	16
7	11.5	18
7	11.5	11
7	11.5	10
7	11.5	20
8	12.5	26
8	12.5	29
8	12.5	21
8	12.5	25
8	12.5	24
9	13.25	69
9	13.25	78
9	13.25	66
9	13.25	89
9	13.25	85
9	13.25	91
9	13.25	122
10	13.75	121
10	13.75	92
10	13.75	129
10	13.75	114
10	13.75	127
11	14.5	226
11	14.5	224
11	14.5	182
11	14.5	298
11	14.5	194
11	14.5	135
11	14.5	192
11	14.5	315
12	15.5	661
12	15.5	642
12	15.5	592
12	15.5	590
12	15.5	469
12	15.5	525
12	15.5	471
13	16.5	1367
13	16.5	1253
13	16.5	1271
13	16.5	1277
13	17.5	1496
13	17.5	1553
13	17.5	1585
13	18.5	2530
13	18.5	2961
14	19.5	3205
14	19.5	2989
14	19.5	2725
15	21.5	3258
15	21.5	3483
15	21.5	3427
