# Supplementary material for: Branching morphogenesis in the developing kidney is not impacted by nephron formation or integration
Source: eLife. 2018 Jul 31;7:e38992. doi: 10.7554/eLife.38992 (PMC6115188; doi:10.7554/eLife.38992)
Supplement: Figure 2—source data 1. — In Imaris, proliferative tips were identified by EdU staining, the number of nephrons counted by E-cadherin labelling and the branch generation determined by observing Trop2 stained ureteric tree branches back to the ureter. Fifty tips were assessed (tip number in column 1), and the number of associated nephrons (column 2) and branch generations were counted (column 3). [file elife-38992-fig2-data1.xlsx]

## Sheet: Sheet1
Tip.assessed	Nephron.number	Branch.generation
1	1	6
2	1	6
3	2	6
4	0	6
5	2	7
6	1	7
7	1	7
8	1	7
9	0	8
10	1	6
11	1	7
12	0	7
13	1	8
14	2	8
15	2	9
16	0	9
17	1	7
18	1	7
19	2	7
20	1	7
21	1	6
22	1	10
23	1	7
24	1	7
25	1	8
26	1	9
27	1	10
28	1	9
29	2	8
30	0	7
31	1	7
32	1	8
33	1	7
34	1	8
35	1	8
36	2	8
38	0	7
39	0	9
40	0	7
41	1	7
42	1	8
43	1	7
44	2	7
45	1	6
46	1	8
47	1	7
48	1	6
49	0	7
50	1	10
