# Supplementary material for: Branching morphogenesis in the developing kidney is not impacted by nephron formation or integration
Source: eLife. 2018 Jul 31;7:e38992. doi: 10.7554/eLife.38992 (PMC6115188; doi:10.7554/eLife.38992)
Supplement: Figure 2—source data 2. [file elife-38992-fig2-data2.xlsx]

## Sheet: Sheet1
Figure	Assay	Measurement	Statistical Test	R function	n (per group)	Comparison	F (DFn, DFd) or other	P value (or other)
2c	light sheet microscopy to assess generation number and nephron attachment	tip generation number vs nephron number	Pearson's R	cor.test(nephronNumber, generation, alternative="two.sided", method="pearson")	50	generation, nephrons attached	R=0.014	p=0.9210
3a	UB tip (tip) proliferation quantification by confocal microscopy	tip proliferation vs age	one-way anova	aov(proliferation ~ age)	49,50,50	E13.5, E17.5, P2 vs Proliferation	F(2,146)	p<2e-16
		tip proliferation vs connected nephrons at E13.5	one-way anova (Welch approximation)	oneway.test(proliferation ~ connected, var.equal=FALSE)	18,31	0,1 connected nephrons	F=3.7947	p= 0.05866
		tip proliferation vs nephric structures at E13.5	one-way anova (Welch approximation)	oneway.test(proliferation ~ structures, var.equal=FALSE)	7,38,4	0,1,2 total nephron structures	F=0.24424	p= 0.79
		tip proliferation vs connected nephrons at E17.5	one-way anova (Welch approximation)	oneway.test(proliferation ~ connected, var.equal=FALSE)	36,11,2	1,2,3 connected nephrons	F=4.0957	p= 0.155
		tip proliferation vs nephric structures at E17.5	one-way anova (Welch approximation)	oneway.test(proliferation ~ structures, var.equal=FALSE)	13,27,10	1,2,3 total nephron structures	F=4.1331	p= 0.0266
		tip proliferation vs connected nephrons at P2	one-way anova (Welch approximation)	oneway.test(proliferation ~ connected, var.equal=FALSE)	6,12,29,3	1,2,3,4 connected nephrons	F=3.5613	p= 0.06687
		tip proliferation vs nephric structures at P2	one-way anova (Welch approximation)	oneway.test(proliferation ~ structures, var.equal=FALSE)	9,22,11,2	3,4,5,6 total nephron structures	F=0.97739	p= 0.4772
3b	Cap mesenchyme (Cap) proliferation quantification by confocal microscopy	cap proliferation vs age	one-way anova	aov(proliferation ~ age)	44,50,50	E13.5, E17.5, P2 vs Proliferation	F(2,141)	p<2e-16
		cap proliferation vs connected nephrons at E13.5	one-way anova (Welch approximation)	oneway.test(proliferation ~ connected, var.equal=FALSE)	16,28	0,1 connected nephrons	F=6.217	p= 0.01827
		cap proliferation vs nephric structures at E13.5	one-way anova (Welch approximation)	oneway.test(proliferation ~ structures, var.equal=FALSE)	7,34,3	0,1,2 total nephron structures	F=1.2258	p= 0.3654
		cap proliferation vs connected nephrons at E17.5	one-way anova (Welch approximation)	oneway.test(proliferation ~ connected, var.equal=FALSE)	36,11,2	1,2,3 connected nephrons	F=1.5862	p= 0.3435
		cap proliferation vs nephric structures at E17.5	one-way anova (Welch approximation)	oneway.test(proliferation ~ structures, var.equal=FALSE)	13,27,10	1,2,3 total nephron structures	F=2.0794	p= 0.1503
		cap proliferation vs connected nephrons at P2	one-way anova (Welch approximation)	oneway.test(proliferation ~ connected, var.equal=FALSE)	6,12,29,3	1,2,3,4 connected nephrons	F=3.1531	p= 0.06605
		cap proliferation vs nephric structures at P2	one-way anova (Welch approximation)	oneway.test(proliferation ~ structures, var.equal=FALSE)	9,22,11,2	3,4,5,6 total nephron structures	F=0.15832	p= 0.921
