# Supplementary material for: Branching morphogenesis in the developing kidney is not impacted by nephron formation or integration
Source: eLife. 2018 Jul 31;7:e38992. doi: 10.7554/eLife.38992 (PMC6115188; doi:10.7554/eLife.38992)
Supplement: Figure 3—source data 1. — The kidneys were imaged using confocal microscopy and analysed using Imaris software. Multiple tips were assessed for each kidney (column 3). The number of attached nephron segments that are continuous with the ureteric tip (column 4) and the total number of nephric structures (both attached and non-attached, column 5) were counted. The same tip was assessed for tip cell number (column 6), Edu positive proliferating cells (column 7), the ratio of proliferative cells to total cell number (column 8). The clustered cap mesenchyme cells associated with the tip were also analysed for cap cell number (column 9), EdU positive proliferating cells (column 10), the ratio of proliferative cells to total cell number (column 11). The values for each tip. [file elife-38992-fig3-data1.xlsx]

## Sheet: Sheet1
Sample.number	Age	TipID	attached.nephron.segments	total.nephric.structures	tip.cell.no	tip.cell.prolif	tip.prolif.ratio	cap.cell.no	cap.cell.prolif	cap.prolif.ratio
1	E13.5	1	1	1	378	188	0.497354	1090	383	0.351376
1	E13.5	2	1	2	567	394	0.694885	788	356	0.451777
1	E13.5	3	1	1	313	194	0.619808	496	273	0.550403
1	E13.5	4	0	1	99	65	0.656566
1	E13.5	5	1	1	118	74	0.627119
1	E13.5	6	1	1	350	243	0.694286	593	298	0.50253
1	E13.5	7	1	1	223	154	0.690583	400	162	0.405
2	E13.5	1	1	1	185	112	0.605405	524	237	0.45229
2	E13.5	2	0	1	209	128	0.61244	355	180	0.507042
2	E13.5	3	0	0	174	110	0.632184	304	136	0.447368
2	E13.5	4	0	1	102	37	0.362745	296	101	0.341216
2	E13.5	5	1	1	107	50	0.46729	509	232	0.455796
2	E13.5	6	0	1	226	128	0.566372	465	211	0.453763
2	E13.5	7	0	0	200	89	0.445	460	156	0.33913
2	E13.5	8	1	1	151	69	0.456954	555	250	0.45045
2	E13.5	9	1	1	297	193	0.649832	933	395	0.423365
2	E13.5	10	1	1	357	213	0.596639	816	391	0.479167
2	E13.5	11	1	1	94	74	0.787234	205	116	0.565854
2	E13.5	12	1	1	105	51	0.485714	244	124	0.508197
3	E13.5	1	1	2	265	110	0.415094	867	267	0.307958
3	E13.5	2	1	2	170	48	0.282353
3	E13.5	1	1	1	205	108.9	0.53122	1269	435	0.34279
3	E13.5	2	1	2	340	173	0.508824	1163	460	0.395529
3	E13.5	1	1	1	187	101	0.540107	603	216	0.358209
3	E13.5	2	1	1	222	109	0.490991	925	325	0.351351
3	E13.5	3	1	1	153	86	0.562092	619	273	0.441034
3	E13.5	4	1	1	348	157	0.451149	668	242	0.362275
4	E13.5	1	1	1	231	105	0.454545	398	168	0.422111
4	E13.5	2	0	1	192	61	0.317708	317	99	0.312303
4	E13.5	3	0	1	189	90	0.47619
4	E13.5	4	1	1	175	105	0.6	485	231	0.476289
4	E13.5	5	0	1	249	98	0.393574	460	179	0.38913
4	E13.5	6	0	1	276	140	0.507246	475	183	0.385263
4	E13.5	7	0	1	131	59	0.450382	310	122	0.393548
4	E13.5	8	1	1	72	38	0.527778
5	E13.5	1	1	1	333	170	0.510511	1074	410	0.38175
5	E13.5	2	1	1	156	89	0.570513	673	274	0.407132
5	E13.5	3	0	0	129	72	0.55814	493	202	0.409736
5	E13.5	4	1	1	171	77	0.450292	385	154	0.4
5	E13.5	5	1	1	81	59	0.728395	263	108	0.410646
6	E13.5	1	0	0	209	102	0.488038	417	158	0.378897
6	E13.5	2	1	1	327	151	0.461774	616	282	0.457792
6	E13.5	3	1	1	246	135	0.54878	478	161	0.33682
6	E13.5	4	1	1	149	111	0.744966	213	123	0.577465
6	E13.5	5	0	0	200	123	0.615	296	115	0.388514
6	E13.5	6	0	0	146	71	0.486301	307	104	0.338762
6	E13.5	7	0	1	196	71	0.362245	246	80	0.325203
6	E13.5	8	0	1	125	56	0.448	317	58	0.182965
6	E13.5	9	0	0	108	60	0.555556	254	98	0.385827
1	E17.5	1	1	2	99	19	0.191919	358	55	0.153631
1	E17.5	2	2	2	90	22	0.244444	277	52	0.187726
1	E17.5	3	1	2	110	31	0.281818	393	106	0.26972
1	E17.5	4	2	2	98	32	0.326531	305	80	0.262295
1	E17.5	5	1	2	90	38	0.422222	380	144	0.378947
1	E17.5	6	1	2	60	22	0.366667	300	87	0.29
1	E17.5	7	1	1	71	33	0.464789	304	61	0.200658
1	E17.5	8	2	2	75	20	0.266667	226	41	0.181416
1	E17.5	9	1	1	85	34	0.4	356	82	0.230337
1	E17.5	10	1	2	85	36	0.423529	241	54	0.224066
2	E17.5	1	2	3	119	31	0.260504	387	90	0.232558
2	E17.5	2	1	1	71	29	0.408451	325	86	0.264615
2	E17.5	3	1	2	57	16	0.280702	227	44	0.193833
2	E17.5	4	1	1	51	6	0.117647	367	114	0.310627
2	E17.5	5	1	3	116	21	0.181034	360	42	0.116667
2	E17.5	6	1	2	50	17	0.34	176	47	0.267045
3	E17.5	1	1	2	118	37	0.313559	442	77	0.174208
3	E17.5	2	2	2	90	35	0.388889	198	41	0.207071
3	E17.5	3	1	3	92	27	0.293478	399	83	0.20802
3	E17.5	4	1	2	83	21	0.253012	270	91	0.337037
3	E17.5	5	1	1	67	29	0.432836	195	52	0.266667
3	E17.5	6	2	2	103	33	0.320388	317	59	0.18612
4	E17.5	1	3	3	117	21	0.179487	318	84	0.264151
4	E17.5	2	2	3	129	34	0.263566	410	74	0.180488
4	E17.5	3	2	3	99	34	0.343434	350	112	0.32
4	E17.5	4	3	3	110	50	0.454545	307	102	0.332248
5	E17.5	1	1	1	67	26	0.38806	359	85	0.236769
5	E17.5	2	1	2	59	16	0.271186	201	38	0.189055
5	E17.5	3	1	1	62	22	0.354839	264	77	0.291667
5	E17.5	4	1	1	50	25	0.5	325	111	0.341538
5	E17.5	5	1	2	61	17	0.278689	235	49	0.208511
5	E17.5	6	1	3	110	34	0.309091	415	69	0.166265
5	E17.5	7	1	1	71	18	0.253521	324	64	0.197531
5	E17.5	8	1	2	61	25	0.409836	249	58	0.232932
6	E17.5	1	1	2	65	23	0.353846	255	80	0.313725
6	E17.5	2	1	2	79	46	0.582278	356	120	0.337079
6	E17.5	3	1	2	67	26	0.38806	268	70	0.261194
6	E17.5	4	1	2	80	45	0.5625	299	91	0.304348
6	E17.5	5	1	1	48	22	0.458333	271	78	0.287823
6	E17.5	6	1	1	62	32	0.516129	288	88	0.305556
6	E17.5	7	1	1	41	28	0.682927	221	82	0.371041
6	E17.5	8	1	1	48	24	0.5	279	96	0.344086
6	E17.5	9	1	2	56	29	0.517857	242	69	0.285124
7	E17.5	1	2	2	85	16	0.188235	255	63	0.247059
7	E17.5	2	0	2	55	22	0.4	283	73	0.257951
7	E17.5	3	2	3	124	43	0.346774	465	138	0.296774
7	E17.5	4	1	2	45	25	0.555556	206	57	0.276699
7	E17.5	5	1	3	93	27	0.290323	393	97	0.246819
7	E17.5	6	1	2	91	29	0.318681	402	60	0.149254
7	E17.5	7	2	2	100	28	0.28	362	90	0.248619
1	P2	1	2	0	35	8	0.228571	101	17	0.168317
1	P2	2	1	0	44	21	0.477273	111	28	0.252252
1	P2	3	2	0	41	7	0.170732	70	14	0.2
1	P2	4	1	0	41	4	0.097561	50	22	0.44
1	P2	5	1	0	29	10	0.344828	56	19	0.339286
1	P2	6	1	0	34	8	0.235294	76	19	0.25
1	P2	7	1	0	25	3	0.12	64	23	0.359375
1	P2	8	3	0	73	11	0.150685	152	51	0.335526
1	P2	1	2	0	61	7	0.114754	74	22	0.297297
1	P2	2	1	0	95	5	0.0526316	41	10	0.243902
1	P2	3	3	0	61	8	0.131148	193	46	0.238342
1	P2	4	3	0	68	13	0.191176	83	28	0.337349
1	P2	5	2	0	27	8	0.296296	66	7	0.106061
1	P2	1	3	0	79	13	0.164557	138	32	0.231884
1	P2	2	3	0	49	9	0.183673	121	29	0.239669
1	P2	3	3	0	37	5	0.135135	66	26	0.393939
1	P2	4	3	0	59	12	0.20339	87	14	0.16092
1	P2	5	3	0	75	21	0.28	96	31	0.322917
1	P2	1	2	0	43	10	0.232558	107	36	0.336449
1	P2	2	3	0	47	10	0.212766	79	16	0.202532
1	P2	3	3	0	55	13	0.236364	77	20	0.25974
1	P2	4	3	0	52	15	0.288462	60	24	0.4
1	P2	1	3	0	64	9	0.140625	116	33	0.284483
1	P2	2	2	0	22	6	0.272727	55	12	0.218182
1	P2	3	3	0	64	23	0.359375	101	28	0.277228
1	P2	4	3	0	40	12	0.3	79	28	0.35443
1	P2	1	3	0	53	14	0.264151	78	19	0.24359
1	P2	2	3	0	53	16	0.301887	118	17	0.144068
1	P2	3	3	0	49	8	0.163265	84	32	0.380952
1	P2	4	2	0	36	7	0.194444	47	8	0.170213
2	P2	1	3	0	72	25	0.347222	70	18	0.257143
2	P2	2	3	0	80	18	0.225	122	22	0.180328
2	P2	3	3	0	68	21	0.308824	76	22	0.289474
2	P2	4	3	0	87	18	0.206897	110	27	0.245455
2	P2	1	4	0	74	6	0.0810811	133	37	0.278195
2	P2	2	2	0	41	7	0.170732	145	40	0.275862
2	P2	3	2	0	45	9	0.2	105	25	0.238095
2	P2	4	3	0	86	14	0.162791	186	34	0.182796
3	P2	1	3	0	83	22	0.26506	250	46	0.184
3	P2	2	3	0	65	18	0.276923	158	28	0.177215
3	P2	3	2	0	36	6	0.166667	78	13	0.166667
3	P2	4	4	0	65	11	0.169231	162	47	0.290123
3	P2	1	2	0	48	9	0.1875	68	21	0.308824
3	P2	2	3	0	58	24	0.413793	117	30	0.25641
3	P2	3	3	0	63	16	0.253968	126	44	0.349206
3	P2	4	3	0	40	9	0.225	61	13	0.213115
3	P2	1	3	0	50	13	0.26	83	25	0.301205
3	P2	2	3	0	82	30	0.365854	178	68	0.382022
3	P2	3	4	0	77	12	0.155844	149	48	0.322148
3	P2	4	2	0	48	12	0.25	90	20	0.222222
